# Supplementary material
Source: publisher figshare collection journal article supplement (https://acs.figshare.com/ndownloader/files/3946675)
Supplement: Supplementary file 1 [file 3946675]

 
data_yxy130810-1 
 
_audit_creation_method            SHELXL-97 
_chemical_name_systematic 
; 
 ? 
; 
_chemical_name_common             ? 
_chemical_melting_point           ? 
_chemical_formula_moiety          
 'C49 H34 N4 O, C O' 
_chemical_formula_sum 
 'C50 H34 N4 O2' 
_chemical_formula_weight          722.81 
 
loop_ 
 _atom_type_symbol 
 _atom_type_description 
 _atom_type_scat_dispersion_real 
 _atom_type_scat_dispersion_imag 
 _atom_type_scat_source 
 'C'  'C'   0.0181   0.0091 
 'International Tables Vol C Tables 4.2.6.8 and 6.1.1.4' 
 'H'  'H'   0.0000   0.0000 
 'International Tables Vol C Tables 4.2.6.8 and 6.1.1.4' 
 'N'  'N'   0.0311   0.0180 
 'International Tables Vol C Tables 4.2.6.8 and 6.1.1.4' 
 'O'  'O'   0.0492   0.0322 
 'International Tables Vol C Tables 4.2.6.8 and 6.1.1.4' 
 
_symmetry_cell_setting            'MONOCLINIC' 
_symmetry_space_group_name_H-M    'P21/c' 
_symmetry_space_group_name_Hall   '-P 2ybc'

 
loop_ 
 _symmetry_equiv_pos_as_xyz 
 'x, y, z' 
 '-x, y+1/2, -z+1/2' 
 '-x, -y, -z' 
 'x, -y-1/2, z-1/2' 
 
_cell_length_a                    14.6447(15) 
_cell_length_b                    8.4919(7) 
_cell_length_c                    15.4380(11) 
_cell_angle_alpha                 90.00 
_cell_angle_beta                  94.180(8) 
_cell_angle_gamma                 90.00 
_cell_volume                      1914.8(3) 
_cell_formula_units_Z             2 
_cell_measurement_temperature     100(2) 
_cell_measurement_reflns_used   2015
_cell_measurement_theta_min     5.7400
_cell_measurement_theta_max     65.0180
 
_exptl_crystal_description        'block'
_exptl_crystal_colour             'brown' 
_exptl_crystal_size_max           0.17 
_exptl_crystal_size_mid           0.05 
_exptl_crystal_size_min           0.04 
_exptl_crystal_density_meas       ? 
_exptl_crystal_density_diffrn     1.254 
_exptl_crystal_density_method     'not measured' 
_exptl_crystal_F_000              756 
_exptl_absorpt_coefficient_mu     0.608 
_exptl_absorpt_correction_type    none 
_exptl_absorpt_correction_T_min   ? 
_exptl_absorpt_correction_T_max   ? 
_exptl_absorpt_process_details    ? 
 
_exptl_special_details 
; 
 ? 
; 
 
_diffrn_ambient_temperature       100(2) 
_diffrn_radiation_wavelength      1.54178 
_diffrn_radiation_type            CuK\a 
_diffrn_radiation_source          'fine-focus sealed tube' 
_diffrn_radiation_monochromator   graphite 
_diffrn_measurement_device_type   'SuperNova, Dual, Cu at zero, Atlas' 
_diffrn_measurement_method        '\w scans' 
_diffrn_detector_area_resol_mean  10.3415 
_diffrn_standards_number          ? 
_diffrn_standards_interval_count  ? 
_diffrn_standards_interval_time   ? 
_diffrn_standards_decay_%         ? 
_diffrn_reflns_number             6182 
_diffrn_reflns_av_R_equivalents   0.0422 
_diffrn_reflns_av_sigmaI/netI     0.0490 
_diffrn_reflns_limit_h_min        -12 
_diffrn_reflns_limit_h_max        16 
_diffrn_reflns_limit_k_min        -7 
_diffrn_reflns_limit_k_max        9 
_diffrn_reflns_limit_l_min        -17 
_diffrn_reflns_limit_l_max        18 
_diffrn_reflns_theta_min          5.75 
_diffrn_reflns_theta_max          65.61 
_reflns_number_total              3184 
_reflns_number_gt                 2327 
_reflns_threshold_expression      >2sigma(I) 
 
_computing_data_collection
;
CrysAlisPro, Agilent Technologies,
Version 1.171.36.28 (release 01-02-2013 CrysAlis171 .NET)
(compiled Feb  1 2013,16:14:44)
;
_computing_cell_refinement
;
CrysAlisPro, Agilent Technologies,
Version 1.171.36.28 (release 01-02-2013 CrysAlis171 .NET)
(compiled Feb  1 2013,16:14:44)
;
_computing_data_reduction
;
CrysAlisPro, Agilent Technologies,
Version 1.171.36.28 (release 01-02-2013 CrysAlis171 .NET)
(compiled Feb  1 2013,16:14:44)
;
_computing_structure_solution     'SHELXS-97 (Sheldrick, 1990)' 
_computing_structure_refinement   'SHELXL-97 (Sheldrick, 1997)' 
_computing_molecular_graphics     ? 
_computing_publication_material   ? 
 
_refine_special_details 
; 
 Refinement of F^2^ against ALL reflections.  The weighted R-factor wR and 
 goodness of fit S are based on F^2^, conventional R-factors R are based 
 on F, with F set to zero for negative F^2^. The threshold expression of 
 F^2^ > 2sigma(F^2^) is used only for calculating R-factors(gt) etc. and is 
 not relevant to the choice of reflections for refinement.  R-factors based 
 on F^2^ are statistically about twice as large as those based on F, and R- 
 factors based on ALL data will be even larger. 
; 
 
_refine_ls_structure_factor_coef  Fsqd  
_refine_ls_matrix_type            full 
_refine_ls_weighting_scheme       calc  
_refine_ls_weighting_details 
 'calc w=1/[\s^2^(Fo^2^)+(0.1000P)^2^+2.5504P] where P=(Fo^2^+2Fc^2^)/3' 
_atom_sites_solution_primary      direct 
_atom_sites_solution_secondary    difmap 
_atom_sites_solution_hydrogens    geom 
_refine_ls_hydrogen_treatment     constr 
_refine_ls_extinction_method      none 
_refine_ls_extinction_coef        ? 
_refine_ls_number_reflns          3184 
_refine_ls_number_parameters      278 
_refine_ls_number_restraints      3 
_refine_ls_R_factor_all           0.1108 
_refine_ls_R_factor_gt            0.0838 
_refine_ls_wR_factor_ref          0.2374 
_refine_ls_wR_factor_gt           0.2139 
_refine_ls_goodness_of_fit_ref    1.130 
_refine_ls_restrained_S_all       1.130 
_refine_ls_shift/su_max           0.000 
_refine_ls_shift/su_mean          0.000 
 
loop_ 
 _atom_site_label 
 _atom_site_type_symbol 
 _atom_site_fract_x 
 _atom_site_fract_y 
 _atom_site_fract_z 
 _atom_site_U_iso_or_equiv 
 _atom_site_adp_type 
 _atom_site_occupancy 
 _atom_site_symmetry_multiplicity 
 _atom_site_calc_flag 
 _atom_site_refinement_flags 
 _atom_site_disorder_assembly 
 _atom_site_disorder_group 
C1 C 0.7154(3) 0.0603(4) 0.4952(2) 0.0367(9) Uani 1 1 d . . . 
N2 N 0.7718(2) 0.0937(4) 0.4274(2) 0.0484(9) Uani 1 1 d . . . 
C3 C 0.7236(3) 0.0574(5) 0.3542(2) 0.0406(9) Uani 1 1 d . . . 
H3A H 0.7451 0.0656 0.2978 0.049 Uiso 1 1 calc R . . 
C4 C 0.6323(3) 0.0030(5) 0.3727(2) 0.0405(9) Uani 1 1 d . . . 
C5 C 0.5642(3) -0.0283(4) 0.3056(2) 0.0375(9) Uani 1 1 d . . . 
C16 C 0.5301(2) 0.0448(4) 0.6910(2) 0.0376(9) Uani 1 1 d . . . 
C17 C 0.5932(3) 0.0882(4) 0.7624(2) 0.0385(9) Uani 1 1 d . . . 
H17A H 0.5778 0.1041 0.8205 0.046 Uiso 1 1 calc R . . 
C18 C 0.6779(3) 0.1031(4) 0.7341(2) 0.0367(9) Uani 1 1 d . . . 
H18A H 0.7321 0.1285 0.7689 0.044 Uiso 1 1 calc R . . 
C19 C 0.6719(2) 0.0741(4) 0.6432(2) 0.0352(8) Uani 1 1 d . . . 
C20 C 0.7385(3) 0.0887(5) 0.5836(2) 0.0378(9) Uani 1 1 d . . . 
C21 C 0.6310(2) 0.0029(4) 0.46325(19) 0.0295(8) Uani 1 1 d . . . 
N24 N 0.5824(2) 0.0340(4) 0.61893(19) 0.0399(8) Uani 1 1 d . . . 
C25 C 0.5672(5) -0.0532(9) 0.5309(4) 0.0366(17) Uani 0.50 1 d P . . 
O1 O 0.5131(4) -0.1612(6) 0.5215(3) 0.0380(12) Uani 0.50 1 d P . . 
C51 C 0.5995(3) -0.0442(4) 0.2167(2) 0.0357(8) Uani 1 1 d . . . 
C52 C 0.6632(3) -0.1582(4) 0.2012(2) 0.0399(9) Uani 1 1 d . . . 
H52A H 0.6829 -0.2289 0.2465 0.048 Uiso 1 1 calc R . . 
C53 C 0.6993(3) -0.1721(5) 0.1204(2) 0.0424(9) Uani 1 1 d . . . 
H53A H 0.7442 -0.2501 0.1117 0.051 Uiso 1 1 calc R . . 
C54 C 0.6698(3) -0.0720(5) 0.0524(2) 0.0436(10) Uani 1 1 d . . . 
C55 C 0.6055(3) 0.0409(5) 0.0679(2) 0.0434(10) Uani 1 1 d . . . 
H55A H 0.5850 0.1102 0.0222 0.052 Uiso 1 1 calc R . . 
C56 C 0.5697(3) 0.0567(5) 0.1482(2) 0.0385(9) Uani 1 1 d . . . 
H56A H 0.5252 0.1353 0.1568 0.046 Uiso 1 1 calc R . . 
C57 C 0.7083(4) -0.0890(6) -0.0350(3) 0.0625(13) Uani 1 1 d . . . 
H57A H 0.6805 -0.0099 -0.0750 0.094 Uiso 1 1 calc R . . 
H57B H 0.6946 -0.1945 -0.0581 0.094 Uiso 1 1 calc R . . 
H57C H 0.7747 -0.0735 -0.0288 0.094 Uiso 1 1 calc R . . 
C201 C 0.8329(3) 0.1411(5) 0.6130(2) 0.0389(9) Uani 1 1 d . . . 
C202 C 0.8466(3) 0.2836(5) 0.6569(2) 0.0426(10) Uani 1 1 d . . . 
H22A H 0.7959 0.3489 0.6673 0.051 Uiso 1 1 calc R . . 
C203 C 0.9347(3) 0.3296(6) 0.6856(2) 0.0495(11) Uani 1 1 d . . . 
H23A H 0.9433 0.4264 0.7159 0.059 Uiso 1 1 calc R . . 
C204 C 1.0105(3) 0.2374(6) 0.6711(2) 0.0491(11) Uani 1 1 d . . . 
C205 C 0.9966(3) 0.0988(5) 0.6258(2) 0.0478(10) Uani 1 1 d . . . 
H25A H 1.0476 0.0353 0.6140 0.057 Uiso 1 1 calc R . . 
C206 C 0.9084(3) 0.0503(5) 0.5969(2) 0.0454(10) Uani 1 1 d . . . 
H26A H 0.9001 -0.0459 0.5660 0.054 Uiso 1 1 calc R . . 
C207 C 1.1053(3) 0.2879(7) 0.7033(3) 0.0641(13) Uani 1 1 d . . . 
H27A H 1.1497 0.2088 0.6871 0.096 Uiso 1 1 calc R . . 
H27B H 1.1086 0.2986 0.7667 0.096 Uiso 1 1 calc R . . 
H27C H 1.1195 0.3894 0.6772 0.096 Uiso 1 1 calc R . . 
O3S O 0.8876(8) 0.3782(16) 0.4327(9) 0.033(3) Uiso 0.181(4) 1 d PD A 1 
C3S C 0.9800(8) 0.376(3) 0.4394(18) 0.042(7) Uiso 0.181(4) 1 d PD A 1 
O4S O 0.8780(12) 0.339(3) 0.3841(15) 0.044(6) Uiso 0.121(3) 1 d PD A -3 
C1S C 0.9682(12) 0.333(3) 0.4090(15) 0.010(5) Uiso 0.121(3) 1 d PD A -3 
O2S O 1.0828(7) 0.3575(14) 0.4565(7) 0.036(4) Uiso 0.198(7) 1 d PD A -2 
C1U C 0.9938(9) 0.333(3) 0.4308(14) 0.029(5) Uiso 0.198(7) 1 d PD A -2 
 
loop_ 
 _atom_site_aniso_label 
 _atom_site_aniso_U_11 
 _atom_site_aniso_U_22 
 _atom_site_aniso_U_33 
 _atom_site_aniso_U_23 
 _atom_site_aniso_U_13 
 _atom_site_aniso_U_12 
C1 0.041(2) 0.044(2) 0.0254(17) -0.0023(15) 0.0057(15) 0.0008(17) 
N2 0.062(2) 0.051(2) 0.0333(17) 0.0002(15) 0.0138(15) 0.0026(17) 
C3 0.055(2) 0.046(2) 0.0220(17) -0.0015(15) 0.0088(16) 0.0041(19) 
C4 0.051(2) 0.041(2) 0.0297(18) 0.0000(16) 0.0099(16) 0.0097(18) 
C5 0.044(2) 0.042(2) 0.0263(17) 0.0052(15) 0.0035(15) 0.0013(17) 
C16 0.036(2) 0.044(2) 0.0335(19) 0.0089(16) 0.0051(15) 0.0029(17) 
C17 0.050(2) 0.038(2) 0.0279(17) -0.0002(15) 0.0106(16) 0.0046(17) 
C18 0.045(2) 0.043(2) 0.0228(16) -0.0054(15) 0.0077(15) -0.0010(17) 
C19 0.0361(19) 0.041(2) 0.0288(17) -0.0025(15) 0.0038(14) 0.0011(16) 
C20 0.044(2) 0.046(2) 0.0247(16) -0.0035(15) 0.0064(15) 0.0045(17) 
C21 0.0327(18) 0.0380(19) 0.0179(15) -0.0017(13) 0.0034(13) -0.0002(15) 
N24 0.0431(18) 0.0440(19) 0.0327(16) 0.0033(14) 0.0024(13) 0.0013(14) 
C25 0.044(4) 0.036(4) 0.030(3) -0.002(3) 0.004(3) 0.012(4) 
O1 0.046(3) 0.032(3) 0.036(3) 0.003(2) -0.001(2) -0.004(2) 
C51 0.040(2) 0.038(2) 0.0287(18) 0.0029(15) 0.0034(15) -0.0073(16) 
C52 0.055(2) 0.037(2) 0.0272(17) 0.0033(15) 0.0046(16) -0.0019(18) 
C53 0.053(2) 0.042(2) 0.0325(19) -0.0033(16) 0.0077(17) -0.0018(18) 
C54 0.058(3) 0.044(2) 0.0292(19) -0.0015(16) 0.0087(17) -0.011(2) 
C55 0.061(3) 0.040(2) 0.0290(18) 0.0071(16) -0.0017(17) -0.0087(19) 
C56 0.042(2) 0.043(2) 0.0303(18) 0.0030(16) 0.0028(16) -0.0023(17) 
C57 0.089(4) 0.068(3) 0.032(2) 0.001(2) 0.016(2) -0.005(3) 
C201 0.039(2) 0.058(2) 0.0208(16) -0.0016(16) 0.0042(14) 0.0031(18) 
C202 0.042(2) 0.058(3) 0.0286(18) -0.0085(17) 0.0083(16) 0.0006(19) 
C203 0.052(2) 0.063(3) 0.0347(19) -0.0107(19) 0.0091(17) -0.002(2) 
C204 0.049(2) 0.071(3) 0.0287(19) -0.0001(19) 0.0063(17) 0.001(2) 
C205 0.043(2) 0.068(3) 0.0323(19) -0.002(2) 0.0043(16) 0.005(2) 
C206 0.051(2) 0.057(3) 0.0288(18) -0.0067(17) 0.0063(17) 0.006(2) 
C207 0.042(2) 0.099(4) 0.050(2) -0.010(3) 0.002(2) -0.002(3) 
 
_geom_special_details 
; 
 All esds (except the esd in the dihedral angle between two l.s. planes) 
 are estimated using the full covariance matrix.  The cell esds are taken 
 into account individually in the estimation of esds in distances, angles 
 and torsion angles; correlations between esds in cell parameters are only 
 used when they are defined by crystal symmetry.  An approximate (isotropic) 
 treatment of cell esds is used for estimating esds involving l.s. planes. 
; 
 
loop_ 
 _geom_bond_atom_site_label_1 
 _geom_bond_atom_site_label_2 
 _geom_bond_distance 
 _geom_bond_site_symmetry_2 
 _geom_bond_publ_flag 
C1 C21 1.385(5) . ? 
C1 C20 1.403(5) . ? 
C1 N2 1.409(4) . ? 
N2 C3 1.325(5) . ? 
C3 C4 1.462(6) . ? 
C3 H3A 0.9500 . ? 
C4 C21 1.399(4) . ? 
C4 C5 1.409(5) . ? 
C5 C16 1.393(5) 3_656 ? 
C5 C51 1.508(5) . ? 
C16 C5 1.393(5) 3_656 ? 
C16 N24 1.398(4) . ? 
C16 C17 1.433(5) . ? 
C17 C18 1.351(5) . ? 
C17 H17A 0.9500 . ? 
C18 C19 1.421(5) . ? 
C18 H18A 0.9500 . ? 
C19 N24 1.380(5) . ? 
C19 C20 1.394(5) . ? 
C20 C201 1.491(5) . ? 
C21 C25 1.528(8) . ? 
N24 C25 1.549(8) . ? 
C25 O1 1.214(9) . ? 
C51 C52 1.377(5) . ? 
C51 C56 1.406(5) . ? 
C52 C53 1.395(5) . ? 
C52 H52A 0.9500 . ? 
C53 C54 1.394(5) . ? 
C53 H53A 0.9500 . ? 
C54 C55 1.378(6) . ? 
C54 C57 1.507(5) . ? 
C55 C56 1.386(5) . ? 
C55 H55A 0.9500 . ? 
C56 H56A 0.9500 . ? 
C57 H57A 0.9800 . ? 
C57 H57B 0.9800 . ? 
C57 H57C 0.9800 . ? 
C201 C206 1.385(5) . ? 
C201 C202 1.394(6) . ? 
C202 C203 1.389(6) . ? 
C202 H22A 0.9500 . ? 
C203 C204 1.390(6) . ? 
C203 H23A 0.9500 . ? 
C204 C205 1.377(6) . ? 
C204 C207 1.503(6) . ? 
C205 C206 1.397(6) . ? 
C205 H25A 0.9500 . ? 
C206 H26A 0.9500 . ? 
C207 H27A 0.9800 . ? 
C207 H27B 0.9800 . ? 
C207 H27C 0.9800 . ? 
O3S C3S 1.349(2) . ? 
O4S C1S 1.350(2) . ? 
O2S C1U 1.351(2) . ? 
 
loop_ 
 _geom_angle_atom_site_label_1 
 _geom_angle_atom_site_label_2 
 _geom_angle_atom_site_label_3 
 _geom_angle 
 _geom_angle_site_symmetry_1 
 _geom_angle_site_symmetry_3 
 _geom_angle_publ_flag 
C21 C1 C20 123.5(3) . . ? 
C21 C1 N2 111.2(3) . . ? 
C20 C1 N2 125.2(3) . . ? 
C3 N2 C1 106.4(3) . . ? 
N2 C3 C4 110.2(3) . . ? 
N2 C3 H3A 124.9 . . ? 
C4 C3 H3A 124.9 . . ? 
C21 C4 C5 132.3(4) . . ? 
C21 C4 C3 105.9(3) . . ? 
C5 C4 C3 121.6(3) . . ? 
C16 C5 C4 129.9(3) 3_656 . ? 
C16 C5 C51 115.6(3) 3_656 . ? 
C4 C5 C51 114.5(3) . . ? 
C5 C16 N24 128.6(3) 3_656 . ? 
C5 C16 C17 125.6(3) 3_656 . ? 
N24 C16 C17 105.6(3) . . ? 
C18 C17 C16 109.3(3) . . ? 
C18 C17 H17A 125.3 . . ? 
C16 C17 H17A 125.3 . . ? 
C17 C18 C19 108.1(3) . . ? 
C17 C18 H18A 126.0 . . ? 
C19 C18 H18A 126.0 . . ? 
N24 C19 C20 122.6(3) . . ? 
N24 C19 C18 107.5(3) . . ? 
C20 C19 C18 129.8(3) . . ? 
C19 C20 C1 119.8(3) . . ? 
C19 C20 C201 120.2(3) . . ? 
C1 C20 C201 119.9(3) . . ? 
C1 C21 C4 106.2(3) . . ? 
C1 C21 C25 116.1(4) . . ? 
C4 C21 C25 137.5(4) . . ? 
C19 N24 C16 109.4(3) . . ? 
C19 N24 C25 115.4(4) . . ? 
C16 N24 C25 132.7(4) . . ? 
O1 C25 C21 125.5(6) . . ? 
O1 C25 N24 121.1(6) . . ? 
C21 C25 N24 113.3(5) . . ? 
C52 C51 C56 118.3(3) . . ? 
C52 C51 C5 120.2(3) . . ? 
C56 C51 C5 121.5(3) . . ? 
C51 C52 C53 121.4(3) . . ? 
C51 C52 H52A 119.3 . . ? 
C53 C52 H52A 119.3 . . ? 
C54 C53 C52 120.3(4) . . ? 
C54 C53 H53A 119.9 . . ? 
C52 C53 H53A 119.9 . . ? 
C55 C54 C53 118.2(3) . . ? 
C55 C54 C57 121.8(4) . . ? 
C53 C54 C57 120.0(4) . . ? 
C54 C55 C56 122.0(4) . . ? 
C54 C55 H55A 119.0 . . ? 
C56 C55 H55A 119.0 . . ? 
C55 C56 C51 119.8(4) . . ? 
C55 C56 H56A 120.1 . . ? 
C51 C56 H56A 120.1 . . ? 
C54 C57 H57A 109.5 . . ? 
C54 C57 H57B 109.5 . . ? 
H57A C57 H57B 109.5 . . ? 
C54 C57 H57C 109.5 . . ? 
H57A C57 H57C 109.5 . . ? 
H57B C57 H57C 109.5 . . ? 
C206 C201 C202 118.8(4) . . ? 
C206 C201 C20 121.0(4) . . ? 
C202 C201 C20 120.3(3) . . ? 
C203 C202 C201 119.8(4) . . ? 
C203 C202 H22A 120.1 . . ? 
C201 C202 H22A 120.1 . . ? 
C202 C203 C204 121.7(4) . . ? 
C202 C203 H23A 119.2 . . ? 
C204 C203 H23A 119.2 . . ? 
C205 C204 C203 118.2(4) . . ? 
C205 C204 C207 120.7(4) . . ? 
C203 C204 C207 121.1(4) . . ? 
C204 C205 C206 120.9(4) . . ? 
C204 C205 H25A 119.6 . . ? 
C206 C205 H25A 119.6 . . ? 
C201 C206 C205 120.7(4) . . ? 
C201 C206 H26A 119.6 . . ? 
C205 C206 H26A 119.6 . . ? 
C204 C207 H27A 109.5 . . ? 
C204 C207 H27B 109.5 . . ? 
H27A C207 H27B 109.5 . . ? 
C204 C207 H27C 109.5 . . ? 
H27A C207 H27C 109.5 . . ? 
H27B C207 H27C 109.5 . . ? 
 
loop_ 
 _geom_torsion_atom_site_label_1 
 _geom_torsion_atom_site_label_2 
 _geom_torsion_atom_site_label_3 
 _geom_torsion_atom_site_label_4 
 _geom_torsion 
 _geom_torsion_site_symmetry_1 
 _geom_torsion_site_symmetry_2 
 _geom_torsion_site_symmetry_3 
 _geom_torsion_site_symmetry_4 
 _geom_torsion_publ_flag 
C21 C1 N2 C3 -0.1(4) . . . . ? 
C20 C1 N2 C3 -176.9(4) . . . . ? 
C1 N2 C3 C4 1.6(4) . . . . ? 
N2 C3 C4 C21 -2.5(4) . . . . ? 
N2 C3 C4 C5 173.6(4) . . . . ? 
C21 C4 C5 C16 11.7(7) . . . 3_656 ? 
C3 C4 C5 C16 -163.4(4) . . . 3_656 ? 
C21 C4 C5 C51 -169.2(4) . . . . ? 
C3 C4 C5 C51 15.8(5) . . . . ? 
C5 C16 C17 C18 -175.9(4) 3_656 . . . ? 
N24 C16 C17 C18 0.3(4) . . . . ? 
C16 C17 C18 C19 1.6(4) . . . . ? 
C17 C18 C19 N24 -2.9(4) . . . . ? 
C17 C18 C19 C20 173.7(4) . . . . ? 
N24 C19 C20 C1 -0.7(6) . . . . ? 
C18 C19 C20 C1 -177.0(4) . . . . ? 
N24 C19 C20 C201 176.6(3) . . . . ? 
C18 C19 C20 C201 0.3(6) . . . . ? 
C21 C1 C20 C19 -6.5(6) . . . . ? 
N2 C1 C20 C19 169.8(4) . . . . ? 
C21 C1 C20 C201 176.2(4) . . . . ? 
N2 C1 C20 C201 -7.5(6) . . . . ? 
C20 C1 C21 C4 175.3(4) . . . . ? 
N2 C1 C21 C4 -1.4(4) . . . . ? 
C20 C1 C21 C25 -9.1(6) . . . . ? 
N2 C1 C21 C25 174.1(4) . . . . ? 
C5 C4 C21 C1 -173.3(4) . . . . ? 
C3 C4 C21 C1 2.3(4) . . . . ? 
C5 C4 C21 C25 12.6(8) . . . . ? 
C3 C4 C21 C25 -171.8(5) . . . . ? 
C20 C19 N24 C16 -173.8(3) . . . . ? 
C18 C19 N24 C16 3.2(4) . . . . ? 
C20 C19 N24 C25 22.0(6) . . . . ? 
C18 C19 N24 C25 -161.0(4) . . . . ? 
C5 C16 N24 C19 173.9(4) 3_656 . . . ? 
C17 C16 N24 C19 -2.2(4) . . . . ? 
C5 C16 N24 C25 -25.7(7) 3_656 . . . ? 
C17 C16 N24 C25 158.2(5) . . . . ? 
C1 C21 C25 O1 -146.6(6) . . . . ? 
C4 C21 C25 O1 27.1(10) . . . . ? 
C1 C21 C25 N24 29.0(6) . . . . ? 
C4 C21 C25 N24 -157.3(4) . . . . ? 
C19 N24 C25 O1 140.5(6) . . . . ? 
C16 N24 C25 O1 -19.0(9) . . . . ? 
C19 N24 C25 C21 -35.3(6) . . . . ? 
C16 N24 C25 C21 165.2(4) . . . . ? 
C16 C5 C51 C52 -121.2(4) 3_656 . . . ? 
C4 C5 C51 C52 59.5(5) . . . . ? 
C16 C5 C51 C56 59.4(5) 3_656 . . . ? 
C4 C5 C51 C56 -119.8(4) . . . . ? 
C56 C51 C52 C53 1.5(6) . . . . ? 
C5 C51 C52 C53 -177.8(3) . . . . ? 
C51 C52 C53 C54 -1.5(6) . . . . ? 
C52 C53 C54 C55 0.8(6) . . . . ? 
C52 C53 C54 C57 -179.2(4) . . . . ? 
C53 C54 C55 C56 -0.3(6) . . . . ? 
C57 C54 C55 C56 179.8(4) . . . . ? 
C54 C55 C56 C51 0.3(6) . . . . ? 
C52 C51 C56 C55 -1.0(5) . . . . ? 
C5 C51 C56 C55 178.4(3) . . . . ? 
C19 C20 C201 C206 124.1(4) . . . . ? 
C1 C20 C201 C206 -58.6(5) . . . . ? 
C19 C20 C201 C202 -56.1(5) . . . . ? 
C1 C20 C201 C202 121.2(4) . . . . ? 
C206 C201 C202 C203 -1.6(5) . . . . ? 
C20 C201 C202 C203 178.6(3) . . . . ? 
C201 C202 C203 C204 0.5(6) . . . . ? 
C202 C203 C204 C205 1.1(6) . . . . ? 
C202 C203 C204 C207 -179.4(4) . . . . ? 
C203 C204 C205 C206 -1.4(6) . . . . ? 
C207 C204 C205 C206 179.0(4) . . . . ? 
C202 C201 C206 C205 1.3(5) . . . . ? 
C20 C201 C206 C205 -178.9(3) . . . . ? 
C204 C205 C206 C201 0.3(6) . . . . ? 
 
_diffrn_measured_fraction_theta_max    0.966 
_diffrn_reflns_theta_full              65.61 
_diffrn_measured_fraction_theta_full   0.966 
_refine_diff_density_max    0.431 
_refine_diff_density_min   -0.409 
_refine_diff_density_rms    0.080 
